# Supplementary material
Source: publisher site journal article supplement (https://www.spandidos-publications.com/1521/downloadSupplementary)
Supplement: Supplementary file 1 [file downloadSupplementary]

Figure S1. Differentiation of NCM460s cells. NCM460s cells were cultured with serum and differentiated to epithelial-like cells. Scale bar, 100  $\mu\text{m}$ . NCM460s, NCM460 spheroid.

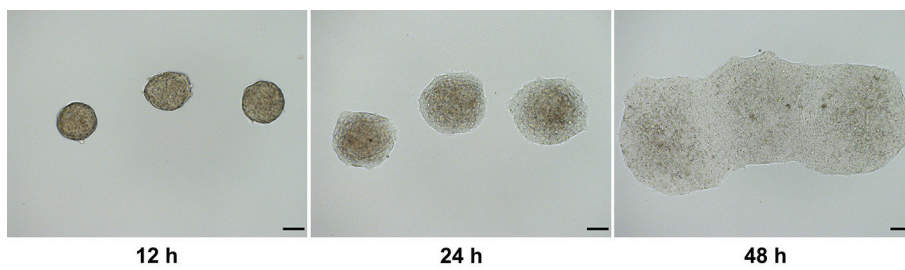

Figure S2. The viability of NCM460s cells was examined by CCK-8 assay following the treatment of 0-100 ng/ml TNF- $\alpha$  for 12, 24, 48 and 72 h. NCM460s, NCM460 spheroid; TNF, tumor necrosis factor.

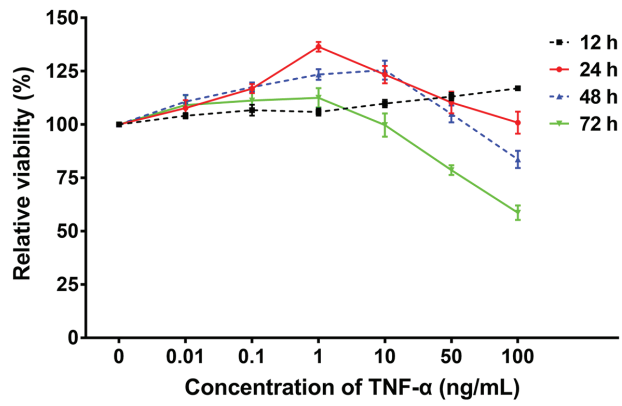

Table SI. Primer sequences used for RT-qPCR experiments.

| Gene          | Primer sequence                                                 |
|---------------|-----------------------------------------------------------------|
| Oct4          | F: 5-AGTGAGAGGCAACCTGGAGA-3<br>R: 5-GTGAAGTGAGGGCTCCATA-3       |
| Nanog         | F: 5-TTCCTTCCTCCATGGATCTG-3<br>R: 5-TCTGGAACCAGGTCTTCACC-3      |
| Sox2          | F: 5-TACAGCATGATGCAGGACCA-3<br>R: 5-TCATGTAGGTCTGCGAGCTG-3      |
| Lgr5          | F: 5-TCTTCACCAACTGCATCCTAAA-3<br>R: 5-GGACTACCACCAGAAGGATAAAC-3 |
| IL-1 $\beta$  | F: 5-ATGGACAAGCTGAGGAAGATG-3<br>R: 5-CCCATGTGTCTGAAGAAGATAGG-3  |
| IL-6          | F: 5-CCTAGAGTACCTCCAGAACAGA-3<br>R: 5-CAGGAACTGGATCAGGACTTT-3   |
| IL-8          | F: 5-CTTGGCAGCCTTCCTGATTT-3<br>R: 5-GGGTGGAAAGGTTTGGAGTATG-3    |
| TNF- $\alpha$ | F: 5-AGAGGGAGAGAAGCAACTACA-3<br>R: 5-GGGTCAGTATGTGAGAGGAAGA-3   |
| p65           | F: 5-ATACCACCAAGACCCACCCC-3<br>R: 5-CCAGGTCCCGCTTCTTCACA-3      |
| GAPDH         | F: 5-ACCCACTCCTCCACCTTTGAC-3<br>R: 5-CACCACCCTGTTGCTGTAGCC-3    |

F, forward; R, reverse; IL, interleukin; TNF, tumor necrosis factor; GAPDH, glyceraldehyde-3-phosphate dehydrogenase.
